# Supplementary material for: ABB Optimizer IT专家优化系统在水泥厂的应用
Source: Royal Society of Chemistry journal article supplement (doi:10.1039/d2cp01544g), 2011-01-01
Supplement: d2cp01544g1.pdf [file d2cp01544g1.pdf]

## Supplementary Information

### Insights into the crucial role of Zn promoter for methanol dehydrogenation to methyl formate over Cu(111) catalyst

Shiping Wu <sup>a,b</sup>, Wei Sun <sup>a,b</sup>, Xuhui Wang <sup>c</sup>, Jinxian Zhao <sup>a,b\*</sup>, Yan Li <sup>a,b</sup>, Yanhong

Quan <sup>a,b</sup>, Jun Ren <sup>a,b\*</sup>

<sup>a</sup> *State Key Laboratory of Clean and Efficient Coal Utilization, Taiyuan University of  
Technology, Taiyuan 030024, China*

<sup>b</sup> *Key Laboratory of Coal Science and Technology Taiyuan University of Technology,  
Ministry of Education*

<sup>c</sup> *School of Electric Power, Civil Engineering and Architecture, Shanxi University,  
Taiyuan 030013, China*

*\*Corresponding author. Mailing address for correspondence: No. 79 Yingze West  
Street, Taiyuan 030024, China. Tel/Fax: +86 351 6018598.*

*E-mail address: [zhaojinxian@tyut.edu.cn](mailto:zhaojinxian@tyut.edu.cn) (J. X. Zhao), [renjun@tyut.edu.cn](mailto:renjun@tyut.edu.cn) (J. Ren).*

## The differences between DFT and DFT-D3 calculation methods

Table S1 list the adsorption energies of CH<sub>3</sub>OH, CH<sub>2</sub>O, CH<sub>3</sub>OCHO and CO using DFT and DFT-D3 calculations. The results show that both DFT and DFT-D3 calculation have very close values of the adsorption energies for the reaction of methanol dehydrogenation.

Table S1. Adsorption energies(kJ/mol) of CH<sub>3</sub>OH, CH<sub>2</sub>O, CH<sub>3</sub>OCHO and CO on Cu catalysts surface with and without DFT-D3 dispersion correction.

| catalysts<br>molecules | Cu <sub>3</sub> Zn(111) |                | Cu(111)           |                |
|------------------------|-------------------------|----------------|-------------------|----------------|
|                        | Without<br>DFT-D3       | With<br>DFT-D3 | Without<br>DFT-D3 | With<br>DFT-D3 |
| CH <sub>3</sub> OH     | -53.0                   | -51.1          | -40.4             | -42.7          |
| CH <sub>2</sub> O      | -23.7                   | -21.3          | -43.6             | -50.7          |
| CH <sub>3</sub> OCHO   | -33.0                   | -41.6          | -37.5             | -48.4          |
| CO                     | -82.1                   | -91.5          | -105.4            | -119.5         |
